# Supplementary material
Source: PubMed Central journal article supplement (PMC10132475)
Supplement: NIHMS1884686-supplement-Supplemental_Material.pdf [file NIHMS1884686-supplement-Supplemental_Material.pdf]

**Table S1***The demographics of the sample stratified by the number of quality check indexes failed*

| Demographics       | Failed none<br>quality checks ( <i>n</i><br>= 125) | Failed one<br>quality check ( <i>n</i><br>=54) | Failed two or more<br>quality checks ( <i>n</i> = 31) |
|--------------------|----------------------------------------------------|------------------------------------------------|-------------------------------------------------------|
|                    | Mean ( <i>SD</i> )/<br>Frequency (%)               | Mean ( <i>SD</i> )/<br>Frequency (%)           | Mean ( <i>SD</i> )/<br>Frequency (%)                  |
| Age                | 37.73 (11.07)                                      | 35.56 (11.39)                                  | 34.19 (9.31)                                          |
| Female             | 53 (42.4)                                          | 19 (35.2)                                      | 6 (19.4)                                              |
| Education          | 15.51 (2.11)                                       | 15.69 (1.88)                                   | 15.94 (2.73)                                          |
| Individual income  |                                                    |                                                |                                                       |
| Less than \$9,999  | 10 (8.0)                                           | 4 (7.4)                                        | 0 (0)                                                 |
| \$10,000-\$29,999  | 31 (24.8)                                          | 13 (24.1)                                      | 4 (12.9)                                              |
| \$30,000-\$49,999  | 38 (30.4)                                          | 15 (27.8)                                      | 6 (19.4)                                              |
| \$50,000-\$69,999  | 25 (20.0)                                          | 10 (18.5)                                      | 11 (35.5)                                             |
| \$70,000-\$89,999  | 10 (8.0)                                           | 8 (14.8)                                       | 9 (29.0)                                              |
| More than \$90,000 | 11 (8.8)                                           | 4 (7.4)                                        | 1 (3.2)                                               |
| Household income   |                                                    |                                                |                                                       |
| Less than \$9,999  | 3 (2.4)                                            | 1 (1.9)                                        | 0 (0)                                                 |
| \$10,000-\$29,999  | 22 (17.6)                                          | 9 (16.7)                                       | 3 (9.7)                                               |
| \$30,000-\$49,999  | 25 (20.0)                                          | 12 (22.2)                                      | 7 (22.6)                                              |
| \$50,000-\$69,999  | 27 (21.6)                                          | 12 (22.2)                                      | 11 (35.5)                                             |
| \$70,000-\$89,999  | 14 (11.2)                                          | 11 (20.4)                                      | 6 (19.4)                                              |
| More than \$90,000 | 34 (27.2)                                          | 9 (16.7)                                       | 4 (12.9)                                              |

**Table S2**

*The numbers of nonsystematic delay discounting responses using the cutoffs in Johnson and Bickel (2008)*

|             | Criterion 2 |      |
|-------------|-------------|------|
|             | Pass        | Fail |
| Criterion 1 |             |      |
| Pass        | 135         | 11   |
| Fail        | 30          | 34   |
